## A STAKEHOLDER-LED UNDERSTANDING OF THE IMPLEMENTATION OF DIGITAL TECHNOLOGIES WITHIN HEART DISEASE DIAGNOSIS: A QUALITATIVE STUDY PROTOCOL

*Abdullayev K<sup>1</sup>, Chico TJA<sup>2</sup>, Manktelow M<sup>3</sup>, Buckley O<sup>4</sup>, Condell J<sup>3</sup>, Van Arkel RJ<sup>5</sup>, Diaz-Zuccarini V<sup>6</sup>, Dr Faith Matcham<sup>1</sup>*

### *Affiliations:*

- 1. School of Psychology, University of Sussex, Brighton, UK*
- 2. Department of Infection, Immunity and Cardiovascular Disease, The Medical School, University of Sheffield, Sheffield, UK*
- 3. School of Computing, Engineering and Intelligent Systems, Ulster University at Magee, Londonderry, UK.*
- 4. School of Computing Sciences, University of East Anglia, Norwich, UK*
- 5. Department of Mechanical Engineering, Imperial College London, London, UK.*
- 6. Department of Mechanical Engineering, University College London, London, UK.*

### **Abstract**

*Introduction* Cardiovascular diseases are highly prevalent amongst the UK population, and the quality of care is being reduced due to accessibility and resource issues. Increased implementation of digital technologies into the cardiovascular care pathway has enormous potential to lighten the load on the NHS, however, it is not possible to adopt this shift without embedding the perspectives of service users and clinicians.

*Methods and Analysis* A series of qualitative studies will be carried out with the aim of developing a stakeholder-led perspective on the implementation of digital technologies to improve holistic diagnosis of heart disease. Focus groups will be carried out with 20 people with lived experience of heart disease, and interviews will be carried out with 10 clinicians with experience of diagnosing heart diseases. The data will be analysed using an inductive thematic analysis approach.

*Ethics and Dissemination* This study received ethical approval from the Sciences and Technology Cross Research Council at the University of Sussex. The findings will be disseminated through conference presentations, peer-reviewed publications and to the study participants.

## Strengths and Limitations

- The study materials have been informed by patient advisory boards, meaning they are sensitive to the experiences of the participants and the clinicians that will be recruited.
- The study will allow an in-depth understanding of the attitudes and experience of people with lived experience of heart disease and clinicians with experience of diagnosing heart disease.
- The use of an online research platform for participant recruitment will disadvantage those less comfortable using online resources. This may include those living in deprived areas without access to high quality technologies (which disproportionately excludes ethnic minority groups) and clinical populations with comorbidities that prevent the use of certain technologies, such as visual, auditory, physical, or learning impairments.
- The use of thematic analysis will not be free from the influence of the researcher's personal experience and knowledge

## Introduction

Cardiovascular diseases (CVDs) are the leading cause of global deaths and are highly prevalent across the world (1). The situation in the UK is no different, with the British Heart Foundation reporting 7.6 million people living in the UK with a heart and circulatory disease in August 2022, and approximately 460 deaths a day (2). In addition to debilitating cardiovascular symptoms, individuals suffering from CVDs often experience a diminished quality of life (3–5), financial burdens from medication and treatments (6–9), and both physical (10–12) and psychological (13–16) comorbidities.

Although CVDs are highly prevalent and potentially very damaging, they can become considerably more manageable, or even preventable, if diagnosed early enough (17). Therefore, implementing secondary prevention measures, in the form of early diagnosis and interventions, is the most effective way of reducing the life-threatening or long-term impacts of CVDs on patient health and wellbeing (18). Technological advancements within

artificial intelligence and data mining may provide the tools for more accurate and effective diagnosis (19,20), and can contribute to reducing cardiovascular mortality (21,22).

In addition to facilitating earlier and more accurate detection of CVDs through artificial intelligence, the increased use of “wearable” ambulatory assessment technology within healthcare has provided solutions for groups facing barriers that are preventing access to primary care, such as transportation limitations in remote locations (23,24), or reduced mobility or capacity due to mental illness (25–27). As a result, those who would have missed the opportunity to receive a timely diagnosis and appropriate treatment, are no longer being excluded due to logistical limitations. Overall, it is clear that the use of remote monitoring technology in heart disease can increase the likelihood of survival and decrease the burden of CVD on the individual and ultimately on healthcare services (28,29).

A variety of digital tools that allow more remote healthcare are already integrated into the NHS. For example, patient records can be accessed remotely thanks to the use electronic databases; patients’ heart rhythms can be monitored over 24 hours from their homes using Holter monitors; and many appointments are carried out on videoconferencing software or telephone calls. Although there is common complaint regarding the quality and modernity of technology being used within the NHS, it is evident – particularly since the COVID-19 pandemic (30,31) – that there has been a rapid increase in the adoption of digital technology within both the NHS (32) and across the world (33). Accordingly, there has also been increased research activity investigating the use of digital technologies in cardiovascular health (34).

When examining the growing use of digital health technologies, it is important to highlight the distinction between the types of technologies that are being implemented, specifically between medical grade devices and consumer technologies. Medical-grade devices require a specific regulatory approval to be used and can come in many forms, including implanted defibrillators and pacemakers, and 24-hour electrocardiograms. The data collected by these devices is usually physiological and requires specialists to monitor and interpret. On the other hand, consumer technologies can include health apps on our smartphones which track our sleep, step-count, and medication adherence. These types of technologies are

usually in the control of the individual, allowing self-monitoring of symptoms and self-management of many conditions, meaning there is less dependence on an already-overwhelmed healthcare system. Therefore, when the increased accuracy of data produced by medical-grade devices is combined with the detailed and personalised information collected by lifestyle technologies, it allows for a more holistic account of patient health to facilitate an accurate and efficient diagnosis of potential heart diseases.

Nevertheless, along with the potential for improving the accuracy and efficiency of diagnosis, the implementation of digital technologies into healthcare poses challenges with usability, feasibility, and accessibility for patients (35–37), particularly those from under-represented groups in society (38,39). Too often, devices and systems are created without enough information regarding the patients' and clinicians' needs, which ultimately results in poor engagement and low cost-effectiveness (35). This highlights the importance of using the voices of stakeholders to inform the development and dissemination of digital health tools into cardiovascular care, as well as any other field within healthcare, otherwise the likelihood of positive effects is very low.

Therefore, a key factor in the growing shift towards the use of digital health tools within any care pathway is to gain a deeper understanding into how the new technology will fit into the existing systems, and to consider the barriers or facilitators to positive engagement from both patients and clinicians.

### Study Objectives

The aim of this project is to develop a stakeholder-led understanding of the implementation of digital technologies to improve holistic diagnosis of heart disease. We have set the following three objectives which will be met via a series of qualitative studies with clinicians and individuals with lived experience of heart disease:

- 1) Develop a deeper understanding of stakeholder experiences of heart disease diagnosis
- 2) Understand stakeholder perspectives on the use of digital health tools within the heart disease diagnosis process

- 3) Explore the most meaningful and useful way of relaying digital data back to patients and clinicians

## **Methods & Analyses**

### Patient and Public Involvement

Prior to the starting participant recruitment, this research was reviewed by a cardiovascular patient advisory group based in Sheffield, which involved all participant-facing documents, including the recruitment materials and focus group schedules. This means we can be confident that the language we will use in the focus groups will be accessible and easy to understand, as well as ensuring that we are covering the important aspects of patient experience during diagnosis and when being asked to use digital health tools by their healthcare providers.

We also met with the NIHR Maudsley Biomedical Research Centre's Race, Ethnicity and Diversity (READ) advisory group to discuss the implementation of digital technologies into heart disease diagnosis from a cultural and ethnicity perspective. This meeting highlighted the importance of considering how cultural and religious attitudes would affect engagement with digital technologies aiming to collect health data, as well as emphasising the role of family in individuals' healthcare amongst ethnic minorities. Given the potential exclusion of certain populations because of our recruitment method, this insight will provide a deeper understanding of additional factors that might contribute to the acceptance and engagement of digital technologies aimed to improve holistic diagnosis of heart disease.

### Study Design

This will be a qualitative study, which will use both focus group and interview designs. The topic guides were developed based on the study objectives, with an even split between (1) patient/clinician experiences of diagnosis and (2) perspectives on the use of digital technologies within healthcare.

## Study Population

For the focus groups, a target of 20 individuals with lived experience of heart disease will be enrolled in total. The following inclusion/exclusion criteria will be applied:

Inclusion criteria: Lifetime diagnosis of heart disease (including but not limited to: angina, heart failure, valve disease, abnormal heart rhythms); aged 18 or over; able to speak English at a level sufficient for participation; able to give informed consent for participation.

Exclusion criteria: Major cognitive impairment or dementia preventing participation.

For the interviews, a target of 10 clinicians who have had any experience (past or present) of diagnosing people with heart disease will be enrolled. The eligibility criteria for inclusion are at least 6 months of experience in working with heart disease patients in any capacity (including cardiology, nursing, primary care, or other healthcare professional in multidisciplinary teams); aged 18 or over; able to speak fluent English; and able to give informed consent for participation.

## Procedure

As we are interested in hearing from participants across a range of disease durations (ie, those with very early symptoms and those who are on established management plans. We plan to recruit via: social media platforms such as LinkedIn, Twitter and Instagram; Prolific; and existing cohorts of people from the investigators' previous research studies who have consented to be contacted for research purposes. Clinicians will be recruited using purposive sampling via personal and professional connections, and social media platforms such as LinkedIn, Twitter and Instagram.

All focus groups and interviews will be carried out online over Zoom, and consent and baseline demographic data will also be collected via online Qualtrics surveys prior to the online study. We expect focus groups to take about two hours and interviews to take about one hour. The focus groups and interviews will be semi-structured and will follow a pre-approved question schedule, split into two sections – patient experience of heart disease and views on digital technologies within healthcare (see Appendix). The same researcher will facilitate all the sessions.

## Data Analysis Plan

Descriptive statistics for demographics, current mental distress levels, confidence using technologies, and participant type-specific questions (including length of time in clinical role for clinicians and details on health condition for participants with lived-experience of heart disease) will be presented.

Transcriptions from both focus group and interview recordings will be validated by the team of researchers and coded and analysed using the NVivo software. In line with Braun and Clarke's 2006 recommendations (40), an inductive thematic analysis approach will be taken, whereby the data from the transcripts will decide the themes, instead of basing them on any previous theoretical basis.

## Ethics and Dissemination

This study was reviewed and approved by the Sciences & Technology Cross-School Research Ethics Council at the University of Sussex (reference ER/FM409/1). The findings will be disseminated through conference presentations, peer-reviewed publications and to the study participants.

### **Acknowledgements:**

We would like to thank the two patient and public involvement groups that helped to inform the design of this study: The NIHR Maudsley Biomedical Research Centre's Race, Ethnicity and Diversity (READ) advisory group and the Sheffield-based Cardiology Patient group.

### **Authors' Contributions:**

**Conceptualisation:** F Matcham, TJ Chico, J Condell, O Buckley, V Diaz, R Van Arkel

**Methodology:** F Matcham, TJ Chico

**Investigation:** K Abdullayev

**Writing – original draft:** K Abdullayev

**Writing – review and editing:** F Matcham, T.J Chico

**Supervision:** F Matcham, TJ Chico

**Project Administration:** K Abdullayev, F Matcham

**Funding Acquisition:** F Matcham, TJ Chico, J Condell, O Buckley, V Diaz, R Van Arkel

### **Funding Statement:**

This work is supported by the UK Engineering and Physical Sciences Research Council (EPSRC) (grant number: EP/X000257/1).

### **Competing Interests Statement:**

There are no conflicts of interest



## References

1. World Health Organisation (WHO). Cardiovascular diseases (CVDs) [Internet]. 2011 [cited 2023 Feb 3]. Available from: [https://www.who.int/news-room/fact-sheets/detail/cardiovascular-diseases-\(cvds\)](https://www.who.int/news-room/fact-sheets/detail/cardiovascular-diseases-(cvds))
2. Health Intelligence Team B. Our vision is a world free from the fear of heart and circulatory diseases. UK Factsheet. 2022.
3. Stafford M, Soljak M, Pledge V, Mindell J. Socio-economic differences in the health-related quality of life impact of cardiovascular conditions. *Eur J Public Health* [Internet]. 2012 Jun 1 [cited 2023 Feb 3];22(3):301–5. Available from: <https://academic.oup.com/eurpub/article/22/3/301/505231>
4. Pandya A, Gaziano TA, Weinstein MC, Cutler D. More americans living longer with cardiovascular disease will increase costs while lowering quality of life. *Health Aff*. 2013 Aug 2;32(10):1706–14.
5. Tušek-Bunc K, Petek D. Comorbidities and characteristics of coronary heart disease patients: Their impact on health-related quality of life. *Health Qual Life Outcomes*. 2016;14(1).
6. Annapureddy A, Valero-Elizondo J, Khera R, Grandhi GR, Spatz ES, Dreyer RP, et al. Association Between Financial Burden, Quality of Life, and Mental Health Among Those With Atherosclerotic Cardiovascular Disease in the United States. *Circ Cardiovasc Qual Outcomes* [Internet]. 2018 Nov 1 [cited 2023 Feb 3];11(11):e005180. Available from: <https://www.ahajournals.org/doi/abs/10.1161/CIRCOUTCOMES.118.005180>
7. Li C, Young BR, Jian W. Association of socioeconomic status with financial burden of disease among elderly patients with cardiovascular disease: Evidence from the China Health and Retirement Longitudinal Survey. *BMJ Open* [Internet]. 2018 [cited 2023 Feb 3];8(3):18703. Available from: <http://bmjopen.bmj.com/>
8. Huffman MD, Rao KD, Pichon-Riviere A, Zhao D, Harikrishnan S, Ramaiya K, et al. A cross-sectional study of the microeconomic impact of cardiovascular disease hospitalization in four low- and middle-income countries. *PLoS One* [Internet]. 2011 [cited 2023 Feb 3];6(6):e20821. Available from: <https://journals.plos.org/plosone/article?id=10.1371/journal.pone.0020821>

9. Mszar R, Grandhi GR, Valero-Elizondo J, Caraballo C, Khera R, Desai N, et al. Cumulative burden of financial hardship from medical bills across the spectrum of diabetes mellitus and atherosclerotic cardiovascular disease among non-elderly adults in the United States. *J Am Heart Assoc* [Internet]. 2020 May 18 [cited 2023 Feb 3];9(10):15523. Available from:  
<https://www.ahajournals.org/doi/abs/10.1161/JAHA.119.015523>
10. Miller J, Edwards LD, Agustí A, Bakke P, Calverley PMA, Celli B, et al. Comorbidity, systemic inflammation and outcomes in the ECLIPSE cohort. *Respir Med*. 2013 Sep 1;107(9):1376–84.
11. Haffner SM. Relationship of metabolic risk factors and development of cardiovascular disease and diabetes. [Internet]. Vol. 14 Suppl 3, Obesity (Silver Spring, Md.). John Wiley & Sons, Ltd; 2006 [cited 2023 Feb 3]. p. 121S-127S. Available from:  
<https://onlinelibrary.wiley.com/doi/full/10.1038/oby.2006.291>
12. Buddeke J, Bots ML, van Dis I, Liem A, Visseren FLJ, Vaartjes I. Trends in comorbidity in patients hospitalised for cardiovascular disease. *Int J Cardiol*. 2017 Dec 1;248:382–8.
13. De Hert M, Detraux J, Vancampfort D. The intriguing relationship between coronary heart disease and mental disorders. *Dialogues Clin Neurosci* [Internet]. 2018 Mar 1 [cited 2023 Feb 3];20(1):31–40. Available from:  
<https://www.tandfonline.com/doi/abs/10.31887/DCNS.2018.20.1/mdehert>
14. Hansen S. Mental health issues associated with cardiovascular disease in women [Internet]. Vol. 26, Psychiatric Clinics of North America. Elsevier; 2003 [cited 2023 Feb 3]. p. 693–712. Available from:  
<http://www.psych.theclinics.com/article/S0193953X03000376/fulltext>
15. Huang KL, Su TP, Chen TJ, Chou YH, Bai YM. Comorbidity of cardiovascular diseases with mood and anxiety disorder: A population based 4-year study. *Psychiatry Clin Neurosci* [Internet]. 2009 Jun 1 [cited 2023 Feb 3];63(3):401–9. Available from:  
<https://onlinelibrary.wiley.com/doi/full/10.1111/j.1440-1819.2009.01974.x>
16. Möller-Leimkühler AM. Gender differences in cardiovascular disease and comorbid depression. *Dialogues Clin Neurosci* [Internet]. 2007 [cited 2023 Feb 3];9(1):71–83. Available from:  
<https://www.tandfonline.com/doi/abs/10.31887/DCNS.2007.9.1/ammoeller>

17. McGill HC, McMahan CA, Gidding SS. Preventing heart disease in the 21st century: Implications of the pathobiological determinants of atherosclerosis in youth (PDAY) study [Internet]. Vol. 117, *Circulation*. Lippincott Williams & Wilkins; 2008 [cited 2023 Feb 3]. p. 1216–27. Available from: <https://www.ahajournals.org/doi/abs/10.1161/CIRCULATIONAHA.107.717033>
18. Karunathilake SP, Ganegoda GU. Secondary Prevention of Cardiovascular Diseases and Application of Technology for Early Diagnosis. Martinez E, editor. *Biomed Res Int* [Internet]. 2018;2018:5767864. Available from: <https://doi.org/10.1155/2018/5767864>
19. Muhammad Y, Almoteri M, Mujlid H, Alharbi A, Alqurashi F, Dutta AK, et al. An ML-Enabled Internet of Things Framework for Early Detection of Heart Disease. *Biomed Res Int* [Internet]. 2022 [cited 2023 Feb 3];2022:12. Available from: <https://doi.org/10.1155/2022/3372296>
20. Muhammad Y, Tahir M, Hayat M, Chong KT. Early and accurate detection and diagnosis of heart disease using intelligent computational model. *Sci Rep* [Internet]. 2020 [cited 2023 Feb 3];10(1). Available from: <https://doi.org/10.1038/s41598-020-76635-9>
21. Mensah GA, Wei GS, Sorlie PD, Fine LJ, Rosenberg Y, Kaufmann PG, et al. Decline in Cardiovascular Mortality: Possible Causes and Implications [Internet]. Vol. 120, *Circulation Research*. Lippincott Williams & Wilkins Hagerstown, MD; 2017 [cited 2023 Feb 3]. p. 366–80. Available from: <https://www.ahajournals.org/doi/abs/10.1161/CIRCRESAHA.116.309115>
22. Ergin A, Muntner P, Sherwin R, He J. Secular trends in cardiovascular disease mortality, incidence, and case fatality rates in adults in the United States. *Am J Med*. 2004 Aug 15;117(4):219–27.
23. Gilthorpe MS, Wilson RC. Rural/urban differences in the association between deprivation and healthcare utilisation. *Soc Sci Med*. 2003 Dec 1;57(11):2055–63.
24. Farmer J, Iversen L, Campbell NC, Guest C, Chesson R, Deans G, et al. Rural/urban differences in accounts of patients' initial decisions to consult primary care. *Heal Place*. 2006 Jun 1;12(2):210–21.
25. Kaufman EA, McDonnell MG, Cristofalo MA, Ries RK. Exploring barriers to primary care for patients with severe mental illness: Frontline patient and provider accounts.

- Issues Ment Health Nurs [Internet]. 2012 Mar [cited 2023 Feb 3];33(3):172–80.  
Available from:  
<https://www.tandfonline.com/doi/abs/10.3109/01612840.2011.638415>
26. Miller CL, Druss BG, Dombrowski EA, Rosenheck RA. Barriers to primary medical care among patients at a community mental health center. *Psychiatr Serv* [Internet]. 2003 Aug 1 [cited 2023 Feb 3];54(8):1158–60. Available from:  
<https://ps.psychiatryonline.org/doi/10.1176/appi.ps.54.8.1158>
  27. Ross LE, Vigod S, Wishart J, Waese M, Spence JD, Oliver J, et al. Barriers and facilitators to primary care for people with mental health and/or substance use issues: A qualitative study. *BMC Fam Pract*. 2015;16(1).
  28. Klersy C, De Silvestri A, Gabutti G, Regoli F, Auricchio A. A Meta-Analysis of Remote Monitoring of Heart Failure Patients. *J Am Coll Cardiol*. 2009 Oct 27;54(18):1683–94.
  29. Kulshreshtha A, Kvedar JC, Goyal A, Halpern EF, Watson AJ. Use of remote monitoring to improve outcomes in patients with heart failure: A pilot trial. *Int J Telemed Appl* [Internet]. 2010 Jan 1 [cited 2023 Feb 3];2010. Available from:  
<https://dl.acm.org/doi/10.1155/2010/870959>
  30. Best J. Wearable technology: Covid-19 and the rise of remote clinical monitoring [Internet]. Vol. 372, *The BMJ*. British Medical Journal Publishing Group; 2021 [cited 2023 Feb 3]. Available from: <https://www.bmj.com/content/372/bmj.n413>
  31. Chidambaram S, Erridge S, Kinross J, Purkayastha S. Observational study of UK mobile health apps for COVID-19 [Internet]. Vol. 2, *The Lancet Digital Health*. Elsevier Ltd; 2020 [cited 2023 Feb 3]. p. e388–90. Available from:  
<http://www.thelancet.com/article/S2589750020301448/fulltext>
  32. Powell J, Newhouse N, Boylan A-M, Williams V. Digital health citizens and the future of the NHS. *Digit Heal* [Internet]. 2016 [cited 2023 Feb 3];2:205520761667203. Available from: <https://us.sagepub.com/en-us/nam/open-access-at-sage>
  33. Islam SMS, Maddison R. Digital health approaches for cardiovascular diseases prevention and management: Lessons from preliminary studies [Internet]. Vol. 7, *mHealth*. AME Publications; 2021 [cited 2023 Feb 3]. Available from:  
</pmc/articles/PMC8326947/>
  34. Zwack CC, Haghani M, Hollings M, Zhang L, Gauci S, Gallagher R, et al. The evolution of digital health technologies in cardiovascular disease research [Internet]. Vol. 6, npj

- Digital Medicine. Nature Publishing Group; 2023 [cited 2023 Feb 3]. p. 1–11. Available from: <https://www.nature.com/articles/s41746-022-00734-2>
35. Whitelaw S, Pellegrini DM, Mamas MA, Cowie M, Van Spall HGC. Barriers and facilitators of the uptake of digital health technology in cardiovascular care: a systematic scoping review. *Eur Hear J - Digit Heal* [Internet]. 2021 May 4 [cited 2023 Feb 3];2(1):62–74. Available from: <https://academic.oup.com/ehjdh/article/2/1/62/6128570>
  36. Bhavnani SP. Digital Health: Opportunities and Challenges to Develop the Next-Generation Technology-Enabled Models of Cardiovascular Care [Internet]. Vol. 16, *Methodist DeBakey cardiovascular journal*. Houston Methodist DeBakey Heart & Vascular Center; 2020 [cited 2023 Feb 3]. p. 296–303. Available from: <https://journal.houstonmethodist.org/articles/10.14797/mdcj-16-4-296>
  37. Dagher L, Nedunchezian S, El Hajjar AH, Zhang Y, Deffer O, Russell A, et al. A cardiovascular clinic patients’ survey to assess challenges and opportunities of digital health adoption during the COVID-19 pandemic. *Cardiovasc Digit Heal J* [Internet]. 2022 Feb 1 [cited 2023 Feb 3];3(1):31–9. Available from: <http://www.cvdigitalhealthjournal.com/article/S2666693621001249/fulltext>
  38. Gilbey D, Morgan H, Lin A, Perry Y. Effectiveness, acceptability, and feasibility of digital health interventions for LGBTIQ+ young people: Systematic review [Internet]. Vol. 22, *Journal of Medical Internet Research*. Journal of Medical Internet Research; 2020 [cited 2023 Feb 3]. p. e20158. Available from: <https://www.jmir.org/2020/12/e20158>
  39. Gentili C, Zetterqvist V, Rickardsson J, Holmström L, Simons LE, Wicksell RK. ACTsmart – development and feasibility of digital Acceptance and Commitment Therapy for adults with chronic pain. *npj Digit Med* [Internet]. 2020 Feb 13 [cited 2023 Feb 3];3(1):1–12. Available from: <https://www.nature.com/articles/s41746-020-0228-4>
  40. Braun V, Clarke V. Using thematic analysis in psychology. *Qualitative research in psychology*. 2006 Jan 1;3(2):77-101.
